# Supplementary material for: The Kunitz-Type Protein ShPI-1 Inhibits Serine Proteases and Voltage-Gated Potassium Channels
Source: Toxins (Basel). 2016 Apr 13;8(4):110. doi: 10.3390/toxins8040110 (PMC4848636; doi:10.3390/toxins8040110)
Supplement: Supplementary file 1 [file toxins-08-00110-s001.txt]

Secondary structure contacts. 
The list of contacting secondary structure elements: PDB ID - 3M7Q chain B

Date= 2015-08-05 17:46:57
                     10        20        30        40        50        60
                      |         |         |         |         |         |
    1 -   61 EAEASICSEPKKVGRCKGYFPRFYFDSETGKCTPFIYGGCGGNGNNFETLHQCRAICRALG
(  -3)-(  57)    GGGGS     S    EEEEEEETTTTEEEEEEE SSS  SS BSSHHHHHHHS
 

Buried surface.
This is the WHAT_IF output: PDB ID - 3M7Q chain B

Date= 2015-08-05 18:51:40


## Pattern-1 ##
Residue:      5 SER (   1 )B      (Prp= 0.00)
 Phi= -62.8 Psi= -20.9 Omega=-179.4
Atom    X     Y     Z   Acc   B   WT   VdW Colr   OK  Use  Vac.   %
  N     8.8  -2.0   4.0  2.6 13.5  0.5  1.7 340    +   -   3.4  77.3
  CA    9.6  -1.0   3.4  2.1 14.3  0.5  1.8 240    +   -   3.0  70.6
  C     9.5   0.4   4.0  0.0 14.6  0.5  1.8 240    +   -   0.5   0.0
  O    10.4   1.2   3.9  0.5 14.7  0.5  1.4 120    +   -   6.8   7.8
  CB    9.2  -0.9   1.9 13.8 14.5  0.5  1.8 240    +   -  13.8 100.0
  OG    7.9  -0.5   1.8  7.5 13.5  0.5  1.4 120    +   -   8.7  86.6
                        26.6                              36.2  73.5
 
Residue:      6 ILE (   2 )B      (Prp= 0.00)
 Phi= -60.6 Psi= -28.8 Omega= 177.0
Atom    X     Y     Z   Acc   B   WT   VdW Colr   OK  Use  Vac.   %
  N     8.5   0.6   4.8  0.0 15.3  1.0  1.7 340    +   -   0.5   0.0
  CA    8.3   1.9   5.5  0.0 16.1  1.0  1.8 240    +   -   2.6   0.0
  C     9.4   2.2   6.5  0.0 14.1  1.0  1.8 240    +   -   0.0 100.0
  O     9.7   3.4   6.7  0.0 13.6  1.0  1.4 120    +   -   6.6   0.0
  CB    6.9   2.1   6.1  0.0 19.2  1.0  1.8 240    +   -   2.6   0.0
  CG1   6.7   1.1   7.4  1.4 21.7  1.0  1.8 240    +   -   6.8  20.5
  CG2   5.7   1.9   5.1 10.3 21.0  1.0  1.8 240    +   -  19.4  53.2
  CD1   7.0   1.9   8.7  0.2 24.0  1.0  1.8 240    +   -  18.0   1.0
                        11.9                              56.5  21.0
 
Residue:      7 CYS (   3 )B      (Prp= 0.00) Bridged with 57 CYS ( 53 )B
 Phi= -61.7 Psi= -18.9 Omega=-178.4
Atom    X     Y     Z   Acc   B   WT   VdW Colr   OK  Use  Vac.   %
  N    10.0   1.2   7.1  0.0 12.6  1.0  1.7 340    +   -   0.3   0.0
  CA   11.2   1.4   8.0  0.0 11.7  1.0  1.8 240    +   -   2.6   0.0
  C    12.3   2.1   7.3  0.3 12.7  1.0  1.8 240    +   -   1.0  33.3
  O    13.2   2.6   8.0  0.2 14.0  1.0  1.4 120    +   -   7.9   2.7
  CB   11.6   0.1   8.6  3.1 11.6  1.0  1.8 240    +   -   8.7  36.0
  SG   10.3  -0.8   9.5  0.0 11.9  1.0  2.0 180    +   -  29.1   0.0
                         3.7                              49.8   7.4
 
Residue:      8 SER (   4 )B      (Prp= 0.00)
 Phi= -96.1 Psi=  -6.5 Omega=-180.0
Atom    X     Y     Z   Acc   B   WT   VdW Colr   OK  Use  Vac.   %
  N    12.4   2.0   6.0  0.0 11.8  1.0  1.7 340    +   -   1.1   0.0
  CA   13.5   2.6   5.2  0.5 12.3  1.0  1.8 240    +   -   2.1  25.0
  C    13.2   4.1   4.7  0.7 13.9  1.0  1.8 240    +   -   1.2  57.1
  O    14.1   4.7   4.1  5.7 14.9  1.0  1.4 120    +   -   7.3  78.3
  CB   13.8   1.7   4.0 10.1 11.9  1.0  1.8 240    +   -  12.8  79.5
  OG   14.3   0.4   4.4  8.7 11.9  1.0  1.4 120    +   -   9.8  88.2
                        25.7                              34.3  75.0
 
Residue:      9 GLU (   5 )B      (Prp= 0.00)
 Phi= -74.2 Psi= 147.1 Omega= 179.8
Atom    X     Y     Z   Acc   B   WT   VdW Colr   OK  Use  Vac.   %
  N    11.9   4.5   4.9  0.0 13.3  1.0  1.7 340    +   -   0.6   0.0
  CA   11.5   5.8   4.5  0.5 14.1  1.0  1.8 240    +   -   1.7  30.0
  C    12.1   6.9   5.4  0.0 13.5  1.0  1.8 240    +   -   0.0 100.0
  O    12.3   6.7   6.6  0.3 12.7  1.0  1.4 120    +   -   5.9   5.4
  CB   10.0   5.9   4.5  0.0 14.0  1.0  1.8 240    +   -   4.5   0.0
  CG    9.3   5.0   3.4  5.8 16.1  1.0  1.8 240    +   -   8.6  67.3
  CD    7.8   5.1   3.5  2.1 17.5  1.0  1.8 240    +   -   7.0  30.0
  OE1   7.2   5.9   4.2  0.0 17.5  1.0  1.4 120    +   -   8.9   0.0
  OE2   7.2   4.2   2.8  5.8 20.0  1.0  1.4 120    +   -  10.5  55.6
                        14.5                              47.7  30.4
 
Residue:     10 PRO (   6 )B      (Prp= 0.00)
 Phi= -75.6 Psi= 159.1 Omega= 168.0
Atom    X     Y     Z   Acc   B   WT   VdW Colr   OK  Use  Vac.   %
  N    12.4   8.1   4.8  0.2 14.3  1.0  1.7 340    +   -   0.3  50.0
  CA   12.9   9.2   5.7  3.0 13.8  1.0  1.8 240    +   -   3.0 100.0
  C    11.9   9.8   6.5  0.0 13.8  1.0  1.8 240    +   -   0.3   0.0
  O    10.7   9.7   6.3  0.0 14.2  1.0  1.4 120    +   -   5.0   0.0
  CB   13.4  10.2   4.6 10.0 15.0  1.0  1.8 240    +   -  10.0 100.0
  CG   12.5  10.0   3.5 10.1 15.0  1.0  1.8 240    +   -  11.7  86.6
  CD   12.2   8.5   3.4  7.2 15.1  1.0  1.8 240    +   -  10.0  71.9
                        30.4                              40.2  75.5


## Pattern-2 ##
Residue:     53 CYS (  49 )B      (Prp= 0.00) Bridged with 32 CYS ( 28 )B
 Phi= -62.8 Psi= -49.6 Omega=-176.0
Atom    X     Y     Z   Acc   B   WT   VdW Colr   OK  Use  Vac.   %
  N     5.2   2.3  16.3  0.0 10.1  1.0  1.7 340    +   -   2.6   0.0
  CA    6.4   2.4  15.5  0.0  9.4  1.0  1.8 240    +   -   3.1   0.0
  C     7.3   1.1  15.7  0.0  9.1  1.0  1.8 240    +   -   0.0 100.0
  O     7.7   0.5  14.7  0.0  9.6  1.0  1.4 120    +   -   5.9   0.0
  CB    7.2   3.6  15.9  0.0  9.9  1.0  1.8 240    +   -   8.6   0.0
  SG    8.8   3.9  15.0  0.0 11.4  1.0  2.0 180    +   -  28.7   0.0
                         0.0                              49.0   0.0
 
Residue:     54 ARG (  50 )B      (Prp= 0.00)
 Phi= -64.8 Psi= -33.7 Omega= 178.1
Atom    X     Y     Z   Acc   B   WT   VdW Colr   OK  Use  Vac.   %
  N     7.5   0.7  16.9  0.0  9.3  1.0  1.7 340    +   -   1.1   0.0
  CA    8.4  -0.4  17.3  0.0  9.8  1.0  1.8 240    +   -   2.4   0.0
  C     7.8  -1.7  16.7  0.5 10.9  1.0  1.8 240    +   -   0.5 100.0
  O     8.6  -2.6  16.3  1.6 11.8  1.0  1.4 120    +   -   7.1  22.4
  CB    8.6  -0.5  18.8  3.5 10.5  1.0  1.8 240    +   -   7.0  50.0
  CG    9.5   0.6  19.3  0.5 11.6  1.0  1.8 240    +   -   7.9   6.7
  CD    9.6   0.5  20.8  5.1 13.3  1.0  1.8 240    +   -   8.2  61.7
  NE   10.7   1.4  21.3  1.7 16.3  1.0  1.7 340    +   -   5.6  30.6
  CZ   10.9   1.7  22.6  1.4 18.4  1.0  1.8 240    +   -   2.4  57.1
  NH1  10.2   1.2  23.5 12.5 19.6  1.0  1.7 340    +   -  15.7  79.2
  NH2  11.9   2.5  22.9 13.7 19.1  1.0  1.7 340    +   -  18.2  75.2
                        40.5                              76.2  53.1
 
Residue:     55 ALA (  51 )B      (Prp= 0.00)
 Phi= -60.6 Psi= -34.1 Omega=-179.5
Atom    X     Y     Z   Acc   B   WT   VdW Colr   OK  Use  Vac.   %
  N     6.5  -1.9  16.7  0.2 10.1  1.0  1.7 340    +   -   2.6   5.9
  CA    5.8  -3.1  16.2  3.1 12.1  1.0  1.8 240    +   -   3.7  85.7
  C     6.2  -3.3  14.7  0.0 12.3  1.0  1.8 240    +   -   0.3   0.0
  O     6.3  -4.5  14.3  7.7 16.0  1.0  1.4 120    +   -   8.1  94.8
  CB    4.3  -3.0  16.4  8.2 11.2  1.0  1.8 240    +   -  19.9  41.2
                        19.2                              34.7  55.4
 
Residue:     56 ILE (  52 )B      (Prp= 0.00)
 Phi= -90.1 Psi= -36.4 Omega=-172.5
Atom    X     Y     Z   Acc   B   WT   VdW Colr   OK  Use  Vac.   %
  N     6.3  -2.2  14.0  0.0 11.8  1.0  1.7 340    +   -   0.6   0.0
  CA    6.6  -2.3  12.6  0.5 10.7  1.0  1.8 240    +   -   0.5 100.0
  C     8.2  -2.3  12.3  0.2 10.7  1.0  1.8 240    +   -   0.5  33.3
  O     8.6  -3.0  11.4  0.8 11.4  1.0  1.4 120    +   -   6.9  12.3
  CB    6.0  -1.1  11.8  0.0 11.1  1.0  1.8 240    +   -   2.6   0.0
  CG1   4.5  -1.1  12.0  1.9 12.9  1.0  1.8 240    +   -   9.6  20.0
  CG2   6.3  -1.3  10.3  1.4 11.1  1.0  1.8 240    +   -  16.6   8.4
  CD1   3.7  -2.3  11.6 17.5 14.1  1.0  1.8 240    +   -  18.7  93.5
                        22.3                              56.1  39.8
 
Residue:     57 CYS (  53 )B      (Prp= 0.00) Bridged with 7 CYS ( 3 )B
 Phi=-134.7 Psi=  95.5 Omega=-177.2
Atom    X     Y     Z   Acc   B   WT   VdW Colr   OK  Use  Vac.   %
  N     8.9  -1.6  13.1  0.0  9.8  1.0  1.7 340    +   -   1.6   0.0
  CA   10.3  -1.4  12.9  0.0 10.1  1.0  1.8 240    +   -   1.6   0.0
  C    11.1  -1.5  14.3  0.0 10.3  1.0  1.8 240    +   -   0.7   0.0
  O    11.2  -0.6  15.1  0.1 11.3  1.0  1.4 120    +   -   6.3   1.7
  CB   10.6   0.0  12.4  0.0 10.9  1.0  1.8 240    +   -   7.9   0.0
  SG    9.6   0.5  10.9  0.0 11.4  1.0  2.0 180    +   -  26.5   0.0
                         0.1                              44.6   0.2


## interatomic contacts ##
The list of contacting atom pairs:

Date= 2015-08-06 19:07:42
 
Calculate contacts 1 - 61 -> 1 - 61 d= 1.000

*** N-terminal region ***
 SER ( 1 )B   CA  <>   CYS (  3 )B   N    D=  4.31  H-ene=  -- 0  (B-B)
 SER ( 1 )B   C   <>   CYS (  3 )B   N    D=  3.16  H-ene=  -- 0  (B-B)
 SER ( 1 )B   C   <>   CYS (  3 )B   CA   D=  4.37  H-ene=  -- 0  (B-B)
 SER ( 1 )B   O   <>   CYS (  3 )B   N    D=  3.21  H-ene=  -- 0  (B-B)
 SER ( 1 )B   O   <>   CYS (  3 )B   CA   D=  4.17  H-ene=  -- 0  (B-B)
 SER ( 1 )B   O   <>   CYS (  3 )B   C    D=  4.03  H-ene=  -- 0  (B-B)
 SER ( 1 )B   C   <>   SER (  4 )B   N    D=  3.83  H-ene=  -- 0  (B-B)
 SER ( 1 )B   C   <>   SER (  4 )B   CB   D=  4.54  H-ene=  -- 0  (B-S)
 SER ( 1 )B   O   <>   SER (  4 )B   N    D=  3.00  H-ene=  0.30  (B-B)
 SER ( 1 )B   O   <>   SER (  4 )B   CA   D=  3.64  H-ene=  -- 0  (B-B)
 SER ( 1 )B   O   <>   SER (  4 )B   C    D=  4.06  H-ene=  -- 0  (B-B)
 SER ( 1 )B   O   <>   SER (  4 )B   CB   D=  3.48  H-ene=  -- 0  (B-S)
 SER ( 1 )B   O   <>   GLU (  5 )B   N    D=  3.79  H-ene=  -- 0  (B-B)
 SER ( 1 )B   O   <>   GLU (  5 )B   CG   D=  4.03  H-ene=  -- 0  (B-S)
 ILE ( 2 )B   N   <>   SER (  4 )B   N    D=  4.35  H-ene=  -- 0  (B-B)
 ILE ( 2 )B   CA  <>   SER (  4 )B   N    D=  4.15  H-ene=  -- 0  (B-B)
 ILE ( 2 )B   C   <>   SER (  4 )B   N    D=  3.04  H-ene=  -- 0  (B-B)
 ILE ( 2 )B   C   <>   SER (  4 )B   CA   D=  4.31  H-ene=  -- 0  (B-B)
 ILE ( 2 )B   C   <>   SER (  4 )B   C    D=  4.57  H-ene=  -- 0  (B-B)
 ILE ( 2 )B   O   <>   SER (  4 )B   N    D=  3.10  H-ene=  -- 0  (B-B)
 ILE ( 2 )B   O   <>   SER (  4 )B   CA   D=  4.15  H-ene=  -- 0  (B-B)
 ILE ( 2 )B   O   <>   SER (  4 )B   C    D=  4.08  H-ene=  -- 0  (B-B)
 ILE ( 2 )B   CA  <>   GLU (  5 )B   CB   D=  4.52  H-ene=  -- 0  (B-S)
 ILE ( 2 )B   CA  <>   GLU (  5 )B   CG   D=  3.92  H-ene=  -- 0  (B-S)
 ILE ( 2 )B   CA  <>   GLU (  5 )B   CD   D=  3.77  H-ene=  -- 0  (B-S)
 ILE ( 2 )B   CA  <>   GLU (  5 )B   OE2  D=  3.74  H-ene=  -- 0  (B-S)
 ILE ( 2 )B   C   <>   GLU (  5 )B   N    D=  3.77  H-ene=  -- 0  (B-B)
 ILE ( 2 )B   C   <>   GLU (  5 )B   CB   D=  4.27  H-ene=  -- 0  (B-S)
 ILE ( 2 )B   C   <>   GLU (  5 )B   CG   D=  4.16  H-ene=  -- 0  (B-S)
 ILE ( 2 )B   C   <>   GLU (  5 )B   CD   D=  4.41  H-ene=  -- 0  (B-S)
 ILE ( 2 )B   O   <>   GLU (  5 )B   N    D=  3.09  H-ene=  0.50  (B-B)
 ILE ( 2 )B   O   <>   GLU (  5 )B   CA   D=  3.77  H-ene=  -- 0  (B-B)
 ILE ( 2 )B   O   <>   GLU (  5 )B   CB   D=  3.39  H-ene=  -- 0  (B-S)
 ILE ( 2 )B   O   <>   GLU (  5 )B   CG   D=  3.68  H-ene=  -- 0  (B-S)
 ILE ( 2 )B   O   <>   GLU (  5 )B   CD   D=  4.06  H-ene=  -- 0  (B-S)
 ILE ( 2 )B   CB  <>   GLU (  5 )B   CD   D=  4.12  H-ene=  -- 0  (S-S)
 ILE ( 2 )B   CB  <>   GLU (  5 )B   OE2  D=  4.02  H-ene=  -- 0  (S-S)
 ILE ( 2 )B   CG2 <>   GLU (  5 )B   CD   D=  4.15  H-ene=  -- 0  (S-S)
 ILE ( 2 )B   CG2 <>   GLU (  5 )B   OE2  D=  3.64  H-ene=  -- 0  (S-S)
 ILE ( 2 )B   CB  <>   GLY ( 40 )B   CA   D=  4.56  H-ene=  -- 0  (S-B)
 ILE ( 2 )B   CB  <>   GLY ( 40 )B   C    D=  4.20  H-ene=  -- 0  (S-B)
 ILE ( 2 )B   CG2 <>   GLY ( 40 )B   CA   D=  4.30  H-ene=  -- 0  (S-B)
 ILE ( 2 )B   CG2 <>   GLY ( 40 )B   C    D=  4.44  H-ene=  -- 0  (S-B)
 ILE ( 2 )B   CD1 <>   GLY ( 40 )B   C    D=  4.45  H-ene=  -- 0  (S-B)
 ILE ( 2 )B   CD1 <>   GLY ( 40 )B   O    D=  3.97  H-ene=  -- 0  (S-B)
 ILE ( 2 )B   C   <>   ASN ( 41 )B   CB   D=  4.48  H-ene=  -- 0  (B-S)
 ILE ( 2 )B   O   <>   ASN ( 41 )B   CB   D=  3.43  H-ene=  -- 0  (B-S)
 ILE ( 2 )B   O   <>   ASN ( 41 )B   CG   D=  3.57  H-ene=  -- 0  (B-S)
 ILE ( 2 )B   O   <>   ASN ( 41 )B   ND2  D=  3.75  H-ene=  -- 0  (B-S)
 ILE ( 2 )B   CB  <>   ASN ( 41 )B   N    D=  4.42  H-ene=  -- 0  (S-B)
 ILE ( 2 )B   CD1 <>   ASN ( 41 )B   CA   D=  4.31  H-ene=  -- 0  (S-B)
 ILE ( 2 )B   CG1 <>   PHE ( 43 )B   CZ   D=  4.58  H-ene=  -- 0  (S-S)
 ILE ( 2 )B   CD1 <>   PHE ( 43 )B   CE1  D=  4.42  H-ene=  -- 0  (S-S)
 ILE ( 2 )B   CD1 <>   PHE ( 43 )B   CE2  D=  3.86  H-ene=  -- 0  (S-S)
 ILE ( 2 )B   CD1 <>   PHE ( 43 )B   CZ   D=  3.32  H-ene=  -- 0  (S-S)
 ILE ( 2 )B   CG1 <>   ILE ( 52 )B   CG2  D=  3.78  H-ene=  -- 0  (S-S)
 ILE ( 2 )B   CD1 <>   ILE ( 52 )B   CB   D=  4.42  H-ene=  -- 0  (S-S)
 ILE ( 2 )B   CD1 <>   ILE ( 52 )B   CG2  D=  3.55  H-ene=  -- 0  (S-S)
 ILE ( 2 )B   C   <>   CYS ( 53 )B   SG   D=  4.75  H-ene=  -- 0  (B-S)
 ILE ( 2 )B   CG1 <>   CYS ( 53 )B   SG   D=  4.64  H-ene=  -- 0  (S-S)
 ILE ( 2 )B   CD1 <>   CYS ( 53 )B   SG   D=  3.73  H-ene=  -- 0  (S-S)
 CYS ( 3 )B   N   <>   GLU (  5 )B   N    D=  4.39  H-ene=  -- 0  (B-B)
 CYS ( 3 )B   CA  <>   GLU (  5 )B   N    D=  4.44  H-ene=  -- 0  (B-B)
 CYS ( 3 )B   C   <>   GLU (  5 )B   N    D=  3.43  H-ene=  -- 0  (B-B)
 CYS ( 3 )B   O   <>   GLU (  5 )B   N    D=  3.82  H-ene=  -- 0  (B-B)
 CYS ( 3 )B   CA  <>   PHE ( 21 )B   CD2  D=  4.39  H-ene=  -- 0  (B-S)
 CYS ( 3 )B   C   <>   PHE ( 21 )B   CD2  D=  4.26  H-ene=  -- 0  (B-S)
 CYS ( 3 )B   O   <>   PHE ( 21 )B   CD2  D=  3.35  H-ene=  -- 0  (B-S)
 CYS ( 3 )B   O   <>   PHE ( 21 )B   CE2  D=  4.08  H-ene=  -- 0  (B-S)
 CYS ( 3 )B   CB  <>   PHE ( 21 )B   CD2  D=  4.16  H-ene=  -- 0  (S-S)
 CYS ( 3 )B   O   <>   SER ( 23 )B   CB   D=  4.03  H-ene=  -- 0  (B-S)
 CYS ( 3 )B   SG  <>   ILE ( 52 )B   C    D=  3.88  H-ene=  -- 0  (S-B)
 CYS ( 3 )B   SG  <>   ILE ( 52 )B   O    D=  3.37  H-ene=  -- 0  (S-B)
 CYS ( 3 )B   SG  <>   ILE ( 52 )B   CG2  D=  4.10  H-ene=  -- 0  (S-S)
 CYS ( 3 )B   N   <>   CYS ( 53 )B   SG   D=  3.92  H-ene=  -- 0  (B-S)
 CYS ( 3 )B   CA  <>   CYS ( 53 )B   SG   D=  3.43  H-ene=  -- 0  (B-S)
 CYS ( 3 )B   C   <>   CYS ( 53 )B   SG   D=  4.79  H-ene=  -- 0  (B-S)
 CYS ( 3 )B   CB  <>   CYS ( 53 )B   CB   D=  3.91  H-ene=  -- 0  (S-S)
 CYS ( 3 )B   SG  <>   CYS ( 53 )B   N    D=  4.01  H-ene=  -- 0  (S-B)
 CYS ( 3 )B   SG  <>   CYS ( 53 )B   CA   D=  3.52  H-ene=  -- 0  (S-B)
 SER ( 4 )B   C   <>   PRO (  6 )B   N    D=  4.15  H-ene=  -- 0  (B-B)
 SER ( 4 )B   O   <>   PRO (  6 )B   N    D=  3.85  H-ene=  -- 0  (B-B)
 GLU ( 5 )B   C   <>   LYS (  7 )B   N    D=  4.22  H-ene=  -- 0  (B-B)
 GLU ( 5 )B   O   <>   LYS (  7 )B   N    D=  3.95  H-ene=  -- 0  (B-B)
 GLU ( 5 )B   CB  <>   ASN ( 39 )B   CG   D=  4.25  H-ene=  -- 0  (S-S)
 GLU ( 5 )B   CB  <>   ASN ( 39 )B   ND2  D=  3.85  H-ene=  -- 0  (S-S)
 GLU ( 5 )B   CD  <>   ASN ( 39 )B   CB   D=  4.35  H-ene=  -- 0  (S-S)
 GLU ( 5 )B   CD  <>   ASN ( 39 )B   CG   D=  4.40  H-ene=  -- 0  (S-S)
 GLU ( 5 )B   OE1 <>   ASN ( 39 )B   C    D=  3.95  H-ene=  -- 0  (S-B)
 GLU ( 5 )B   OE1 <>   ASN ( 39 )B   CB   D=  3.37  H-ene=  -- 0  (S-S)
 GLU ( 5 )B   OE1 <>   ASN ( 39 )B   CG   D=  3.37  H-ene=  -- 0  (S-S)
 GLU ( 5 )B   OE1 <>   ASN ( 39 )B   OD1  D=  3.66  H-ene=  -- 0  (S-S)
 GLU ( 5 )B   OE1 <>   ASN ( 39 )B   ND2  D=  3.80  H-ene=  -- 0  (S-S)
 GLU ( 5 )B   CD  <>   GLY ( 40 )B   N    D=  4.07  H-ene=  -- 0  (S-B)
 GLU ( 5 )B   CD  <>   GLY ( 40 )B   CA   D=  4.45  H-ene=  -- 0  (S-B)
 GLU ( 5 )B   OE1 <>   GLY ( 40 )B   N    D=  2.97  H-ene=  0.48  (S-B)
 GLU ( 5 )B   OE1 <>   GLY ( 40 )B   CA   D=  3.50  H-ene=  -- 0  (S-B)
 GLU ( 5 )B   OE1 <>   GLY ( 40 )B   C    D=  3.80  H-ene=  -- 0  (S-B)
 GLU ( 5 )B   C   <>   ASN ( 41 )B   CB   D=  4.52  H-ene=  -- 0  (B-S)
 GLU ( 5 )B   C   <>   ASN ( 41 )B   ND2  D=  3.92  H-ene=  -- 0  (B-S)
 GLU ( 5 )B   O   <>   ASN ( 41 )B   CB   D=  4.06  H-ene=  -- 0  (B-S)
 GLU ( 5 )B   O   <>   ASN ( 41 )B   CG   D=  3.92  H-ene=  -- 0  (B-S)
 GLU ( 5 )B   O   <>   ASN ( 41 )B   ND2  D=  2.89  H-ene=  0.59  (B-S)
 GLU ( 5 )B   CB  <>   ASN ( 41 )B   CB   D=  3.96  H-ene=  -- 0  (S-S)
 GLU ( 5 )B   CD  <>   ASN ( 41 )B   N    D=  4.37  H-ene=  -- 0  (S-B)
 GLU ( 5 )B   OE1 <>   ASN ( 41 )B   N    D=  3.31  H-ene=  0.27  (S-B)
 GLU ( 5 )B   OE1 <>   ASN ( 41 )B   CB   D=  4.13  H-ene=  -- 0  (S-S)
 PRO ( 6 )B   C   <>   LYS (  8 )B   N    D=  3.78  H-ene=  -- 0  (B-B)
 PRO ( 6 )B   O   <>   LYS (  8 )B   N    D=  3.39  H-ene=  -- 0  (B-B)
 PRO ( 6 )B   N   <>   ASN ( 39 )B   ND2  D=  4.16  H-ene=  -- 0  (B-S)
 PRO ( 6 )B   C   <>   ASN ( 39 )B   ND2  D=  3.99  H-ene=  -- 0  (B-S)
 PRO ( 6 )B   O   <>   ASN ( 39 )B   CG   D=  3.70  H-ene=  -- 0  (B-S)
 PRO ( 6 )B   O   <>   ASN ( 39 )B   OD1  D=  3.73  H-ene=  -- 0  (B-S)
 PRO ( 6 )B   O   <>   ASN ( 39 )B   ND2  D=  2.82  H-ene=  0.81  (B-S)
 PRO ( 6 )B   CG  <>   ASN ( 39 )B   ND2  D=  4.25  H-ene=  -- 0  (S-S)
 PRO ( 6 )B   CD  <>   ASN ( 39 )B   ND2  D=  4.04  H-ene=  -- 0  (S-S)

*** C-terminal region ***
 CYS ( 49 )B   N  <>   ALA ( 51 )B   N    D=  4.39  H-ene=  -- 0  (B-B)
 CYS ( 49 )B   CA <>   ALA ( 51 )B   N    D=  4.43  H-ene=  -- 0  (B-B)
 CYS ( 49 )B   C  <>   ALA ( 51 )B   N    D=  3.27  H-ene=  -- 0  (B-B)
 CYS ( 49 )B   C  <>   ALA ( 51 )B   CA   D=  4.48  H-ene=  -- 0  (B-B)
 CYS ( 49 )B   O  <>   ALA ( 51 )B   N    D=  3.37  H-ene=  -- 0  (B-B)
 CYS ( 49 )B   O  <>   ALA ( 51 )B   C    D=  4.14  H-ene=  -- 0  (B-B)
 CYS ( 49 )B   C  <>   ILE ( 52 )B   N    D=  3.88  H-ene=  -- 0  (B-B)
 CYS ( 49 )B   O  <>   ILE ( 52 )B   N    D=  3.16  H-ene=  0.32  (B-B)
 CYS ( 49 )B   O  <>   ILE ( 52 )B   CA   D=  3.71  H-ene=  -- 0  (B-B)
 CYS ( 49 )B   O  <>   ILE ( 52 )B   C    D=  3.74  H-ene=  -- 0  (B-B)
 CYS ( 49 )B   O  <>   ILE ( 52 )B   CB   D=  3.78  H-ene=  -- 0  (B-S)
 CYS ( 49 )B   C  <>   CYS ( 53 )B   N    D=  4.05  H-ene=  -- 0  (B-B)
 CYS ( 49 )B   O  <>   CYS ( 53 )B   N    D=  2.87  H-ene=  0.61  (B-B)
 CYS ( 49 )B   O  <>   CYS ( 53 )B   CA   D=  3.67  H-ene=  -- 0  (B-B)
 CYS ( 49 )B   O  <>   CYS ( 53 )B   C    D=  3.98  H-ene=  -- 0  (B-B)
 CYS ( 49 )B   O  <>   CYS ( 53 )B   O    D=  3.66  H-ene=  -- 0  (B-B)
 CYS ( 49 )B   O  <>   CYS ( 53 )B   CB   D=  3.72  H-ene=  -- 0  (B-S)
 CYS ( 49 )B   O  <>   CYS ( 53 )B   SG   D=  4.27  H-ene=  -- 0  (B-S)
 ARG ( 50 )B   N  <>   ILE ( 52 )B   N    D=  4.34  H-ene=  -- 0  (B-B)
 ARG ( 50 )B   CA <>   ILE ( 52 )B   N    D=  4.26  H-ene=  -- 0  (B-B)
 ARG ( 50 )B   C  <>   ILE ( 52 )B   N    D=  3.17  H-ene=  -- 0  (B-B)
 ARG ( 50 )B   C  <>   ILE ( 52 )B   CA   D=  4.38  H-ene=  -- 0  (B-B)
 ARG ( 50 )B   C  <>   ILE ( 52 )B   C    D=  4.46  H-ene=  -- 0  (B-B)
 ARG ( 50 )B   O  <>   ILE ( 52 )B   N    D=  3.30  H-ene=  -- 0  (B-B)
 ARG ( 50 )B   O  <>   ILE ( 52 )B   C    D=  4.06  H-ene=  -- 0  (B-B)
 ARG ( 50 )B   CA <>   CYS ( 53 )B   N    D=  4.31  H-ene=  -- 0  (B-B)
 ARG ( 50 )B   CA <>   CYS ( 53 )B   C    D=  4.20  H-ene=  -- 0  (B-B)
 ARG ( 50 )B   CA <>   CYS ( 53 )B   O    D=  3.58  H-ene=  -- 0  (B-B)
 ARG ( 50 )B   C  <>   CYS ( 53 )B   N    D=  3.75  H-ene=  -- 0  (B-B)
 ARG ( 50 )B   C  <>   CYS ( 53 )B   CA   D=  4.56  H-ene=  -- 0  (B-B)
 ARG ( 50 )B   C  <>   CYS ( 53 )B   C    D=  4.10  H-ene=  -- 0  (B-B)
 ARG ( 50 )B   C  <>   CYS ( 53 )B   O    D=  3.94  H-ene=  -- 0  (B-B)
 ARG ( 50 )B   O  <>   CYS ( 53 )B   N    D=  3.38  H-ene=  -- 0  (B-B)
 ARG ( 50 )B   O  <>   CYS ( 53 )B   CA   D=  4.02  H-ene=  -- 0  (B-B)
 ARG ( 50 )B   O  <>   CYS ( 53 )B   C    D=  3.43  H-ene=  -- 0  (B-B)
 ARG ( 50 )B   O  <>   CYS ( 53 )B   O    D=  3.54  H-ene=  -- 0  (B-B)
 ARG ( 50 )B   O  <>   ARG ( 54 )B   N    D=  3.55  H-ene=  -- 0  (B-B)
 ARG ( 50 )B   O  <>   ARG ( 54 )B   CA   D=  3.80  H-ene=  -- 0  (B-B)
 ALA ( 51 )B   N  <>   CYS ( 53 )B   N    D=  4.31  H-ene=  -- 0  (B-B)
 ALA ( 51 )B   C  <>   CYS ( 53 )B   N    D=  3.60  H-ene=  -- 0  (B-B)
 ALA ( 51 )B   O  <>   CYS ( 53 )B   N    D=  4.05  H-ene=  -- 0  (B-B)
 ILE ( 52 )B   C  <>   ARG ( 54 )B   N    D=  4.12  H-ene=  -- 0  (B-B)
 CYS ( 53 )B   C  <>   ALA ( 55 )B   N    D=  4.19  H-ene=  -- 0  (B-B)
 CYS ( 53 )B   O  <>   ALA ( 55 )B   N    D=  3.88  H-ene=  -- 0  (B-B)
